# Supplementary material for: A non-canonical role for the EDC4 decapping factor in regulating MARF1-mediated mRNA decay
Source: eLife. 2020 Jun 8;9:e54995. doi: 10.7554/eLife.54995 (PMC7279887; doi:10.7554/eLife.54995)
Supplement: Supplementary file 2. [file elife-54995-supp2.xlsx]

## Sheet: Sheet1
Brothers et al., 2020
Supplementary Table 2
Gene symbol	Gene name	Marf1GT/GT (Fold Change)	Marf1D272A/D272A (Fold Change)
ATXN7L3	Ataxin 7-like 3	261.615	112.422
ZFP36L2	Zinc finger protein 36, C3H type-like 2	53.2515	42.7567
IRS2	Insulin receptor substrate 2	42.7449	44.8476
CBX6	Chromobox 6	38.0262
FAF2	Fas associated factor family member 2	35.6967	24.1169
CPSF7	Cleavage and polyadenylation specific factor 7	35.0339	30.6582
ADCY6	Adenylate cyclase 6	25.0093	25.0735
PURB	Purine rich element binding protein B	23.5377	23.3962
HIPK1	Homeodomain interacting protein kinase 1	22.1154	10.7525
NORAD	Non-coding RNA activated by DNA damage	19.7878	19.8499
TP53RK	TOX high mobility group box family member 4	19.6113	4.72328
FAM217B	Family with sequence similarity 217, member B	17.3301	19.7985
IGF2BP1	Insulin-like growth factor 2 mrna binding protein 2	16.1527	21.391
ZNF24	Zinc finger protein 24	15.0476	14.3899
URB2	URB2 ribosome biogenesis 2 homolog (S. Cerevisiae)	14.94	17.7418
NAT8L	N-acetyltransferase 8 (GCN5-related)	13.4449	18.6432
DNAJC5	Dnaj heat shock protein family (Hsp40) member C5 beta	13.1611	9.28048
PGAM1	Phosphoglycerate mutase 1	12.7102	10.481
ZNF609	Zinc finger protein 609	9.55331	9.08106
SPAG9	Sperm associated antigen 9	8.99355	7.11
LARP1	La ribonucleoprotein domain family, member 1	8.44039	14.8618
TFRC	Transferrin receptor	7.47306	5.72915
FLVCR1	Fibronectin leucine rich transmembrane protein 3	6.62789	10.0355
ZYG11B	Zyg-ll family member B, cell cycle regulator	6.14631	5.21606
WEE1	WEE 1 homolog 1 (S. Pombe)	5.54885	5.24855
MAML1	Mastermind like transcriptional coactivator 1	5.00427	5.3146
ROCK2	Rho-associated coiled-coil containing protein kinase 2	4.94575	4.67809
NUDT21	Nudix (nucleoside diphosphate linked moiety X)-type motif 21	4.6719	4.93698
GOSR1	Golgi SNAP receptor complex member 1	4.50301	6.49748
WNT5A	Wingless-type MMTV integration site family, member 5A	4.24976	4.18785
CDON	Cell adhesion molecule-related/down-regulated by oncogenes		4.6215
ENC1	Ectodermal-neural cortex 1		4.53568
NFAT5	Nuclear factor of activated T cells 5		4.59913
PRKCA	Protein kinase C, alpha		10.4342
